# Supplementary material
Source: PubMed Central journal article supplement (PMC4851425)
Supplement: NIHMS780579-supplement-supplement_1.pdf [file NIHMS780579-supplement-supplement_1.pdf]

**Supplementary Table 1. Factor Loadings and Descriptive Statistics for National Tract-level Disadvantage Measure (73,033 Tracts)**

| <b>Variable</b>        | <b>Factor Loading</b> | <b>Mean</b> | <b>SD</b> |
|------------------------|-----------------------|-------------|-----------|
| Below poverty line     | 0.82                  | 11.76       | 11.79     |
| On public assistance   | 0.72                  | 2.72        | 3.42      |
| Female-headed families | 0.87                  | 13.29       | 8.97      |
| Unemployed             | 0.76                  | 8.55        | 5.78      |
| Less than age 18       | 0.44                  | 23.74       | 7.16      |
| Black                  | 0.69                  | 13.55       | 22.46     |

**Supplementary Table 2. Predictors of Household Characteristics, Odds Ratios**

|                       | Maternal Grandmother Coresides |     | Married |     | Cohabiting |     | Other Relationship Status |   |
|-----------------------|--------------------------------|-----|---------|-----|------------|-----|---------------------------|---|
|                       | b                              |     | b       |     | b          |     | b                         |   |
| Disadvantage          | 0.99                           |     | 0.81    | **  | 1.03       |     | 1.10                      |   |
| Age (Years)           | 0.85                           | *** | 1.14    | *** | 0.95       | **  | 1.00                      |   |
| Mother's Race         |                                |     |         |     |            |     |                           |   |
| Black                 | 9.84                           | *   | 0.01    | *** | 1.01       |     | 12.71                     | * |
| Asian                 | 2.18                           |     | 2.30    |     | 0.53       |     | 1.00                      |   |
| Other                 | 1.90                           |     | 0.52    | *   | 0.93       |     | 1.57                      |   |
| Hispanic              | 0.94                           |     | 0.37    | *** | 3.64       | *** | 1.64                      |   |
| Years Education       | 0.99                           |     | 1.19    | *** | 0.95       | *   | 0.90                      | * |
| Black * Education     | 0.91                           |     | 1.22    | *** | 1.04       |     | 0.90                      |   |
| Parity                | 0.77                           | *   | 1.07    |     | 1.05       |     | 1.09                      |   |
| Constant              | 8.49                           | *   | 0.01    | *** | 1.14       |     | 0.10                      | * |
| Pseudo-R <sup>2</sup> | 0.19                           |     | 0.39    |     | 0.10       |     | 0.07                      |   |
| N                     | 1378                           |     | 1378    |     | 1378       |     | 1378                      |   |

\*\*\*  $p < 0.001$ ; \*\*  $p < 0.01$ ; \*  $p < 0.05$ ; +  $p < 0.1$ ; Newborn Epigenetic Study, 2009-2011 ( $N=489$ )
